# Supplementary material for: Metabolic analysis of butanol production from acetate in Clostridium saccharoperbutylacetonicum N1-4 using13C tracer experiments
Source: Royal Society of Chemistry journal article supplement (doi:10.1039/c4ra09571e), 2014-12-22
Supplement: c4ra09571e1.pdf [file c4ra09571e1.pdf]

## Electronic Supplementary Information

### Metabolic analysis of butanol production from acetate in *Clostridium saccharoperbutylacetonicum* N1-4 using <sup>13</sup>C tracer experiments

Ming Gao,<sup>a</sup> Yukihiro Tashiro,<sup>b, c</sup> Tsuyoshi Yoshida,<sup>a</sup> Jin Zheng,<sup>a</sup> Qunhui Wang,<sup>d</sup> Kenji Sakai,<sup>b</sup> Kenji Sonomoto\*<sup>a, e</sup>

<sup>a</sup> Laboratory of Microbial Technology, Division of Systems Bioengineering, Department of Bioscience and Biotechnology, Faculty of Agriculture, Graduate School, Kyushu University, 6-10-1 Hakozaki, Higashi-ku, Fukuoka 812-8581, Japan

<sup>b</sup> Laboratory of Soil Microbiology, Division of Systems Bioengineering, Department of Bioscience and Biotechnology, Faculty of Agriculture, Graduate School, Kyushu University, Japan, 6-10-1 Hakozaki, Higashi-ku, Fukuoka 812-8581, Japan

<sup>c</sup> Institute of Advanced Study, Kyushu University, 6-10-1 Hakozaki, Higashi-ku, Fukuoka 812-8581, Japan

<sup>d</sup> Department of Environmental Engineering, University of Science and Technology Beijing, Beijing 100083, China

<sup>e</sup> Laboratory of Functional Food Design, Department of Functional Metabolic Design, Bio-Architecture Centre, Kyushu University, 6-10-1 Hakozaki, Higashi-ku, Fukuoka 812-8581, Japan

\*Corresponding author E-mail: [sonomoto@agr.kyushu-u.ac.jp](mailto:sonomoto@agr.kyushu-u.ac.jp) Tel/Fax: +81-(0)92-642-3019

**Table S1.** Additional parameters of batch cultures in TY medium containing exogenously added acetate

| Initial acetate (g/L) | Glucose consumption <sup>a</sup> (g/L) | Maximum glucose consumption rate (g/L/h) | Acetate/glucose consumption <sup>a,b</sup> (C-mol/C-mol) | Acetone yield <sup>a,c</sup> (C-mol/C-mol) | Ethanol yield <sup>a,d</sup> (C-mol/C-mol) | Ratio of acetone/butanol <sup>a</sup> (g/g) | Maximum specific butanol production <sup>e</sup> rate (g/g/h) |
|-----------------------|----------------------------------------|------------------------------------------|----------------------------------------------------------|--------------------------------------------|--------------------------------------------|---------------------------------------------|---------------------------------------------------------------|
| A0                    | 33.6                                   | 1.44 (24h)                               | —                                                        | 0.150                                      | 0.0204                                     | 0.384                                       | 0.245 (18h)                                                   |
| A2                    | 46.5                                   | 2.67 (18h)                               | 0.0363                                                   | 0.153                                      | 0.0436                                     | 0.354                                       | 0.529 (9h)                                                    |
| A4                    | 46.2                                   | 2.54 (18h)                               | 0.0739                                                   | 0.193                                      | 0.0300                                     | 0.488                                       | 0.540 (9h)                                                    |
| A6                    | 46.2                                   | 2.48 (18h)                               | 0.107                                                    | 0.231                                      | 0.0250                                     | 0.642                                       | 0.331 (18h)                                                   |

Batch cultures were performed using *C. saccharoperbutylacetonicum* N1-4 at 30°C, for 72, h in TY medium containing 50 g/L glucose, without pH control (working volume, 300 ml).

<sup>a</sup> The parameters were calculated after 72-h cultivation period. <sup>b</sup> Acetate/glucose consumption (C-mol/C-mol) = Acetate consumption (mM) × 2/glucose consumption (mM) × 6. <sup>c</sup> Acetone production/total substrates consumption (C-mol/C-mol) = Acetone production (mM) × 3/[glucose consumption (mM) × 6 + Acetate consumption (mM) × 2]. <sup>d</sup> Ethanol production / total substrates consumption (C-mol/C-mol) = Ethanol production (mM) × 2/[glucose consumption (mM) × 6 + Acetate consumption (mM) × 2]. <sup>e</sup> Specific butanol production rate (g/g/h) = 2 × (C<sub>2</sub> - C<sub>1</sub>) / (t<sub>2</sub> - t<sub>1</sub>) / (X<sub>2</sub> +

$X_i$ ), where  $C$  is the butanol concentration (g/L),  $t$  is the sampling time (h) and  $X_1$  and  $X_2$  are the dry cell weight at  $t_1$  and  $t_2$ , respectively (g/L).

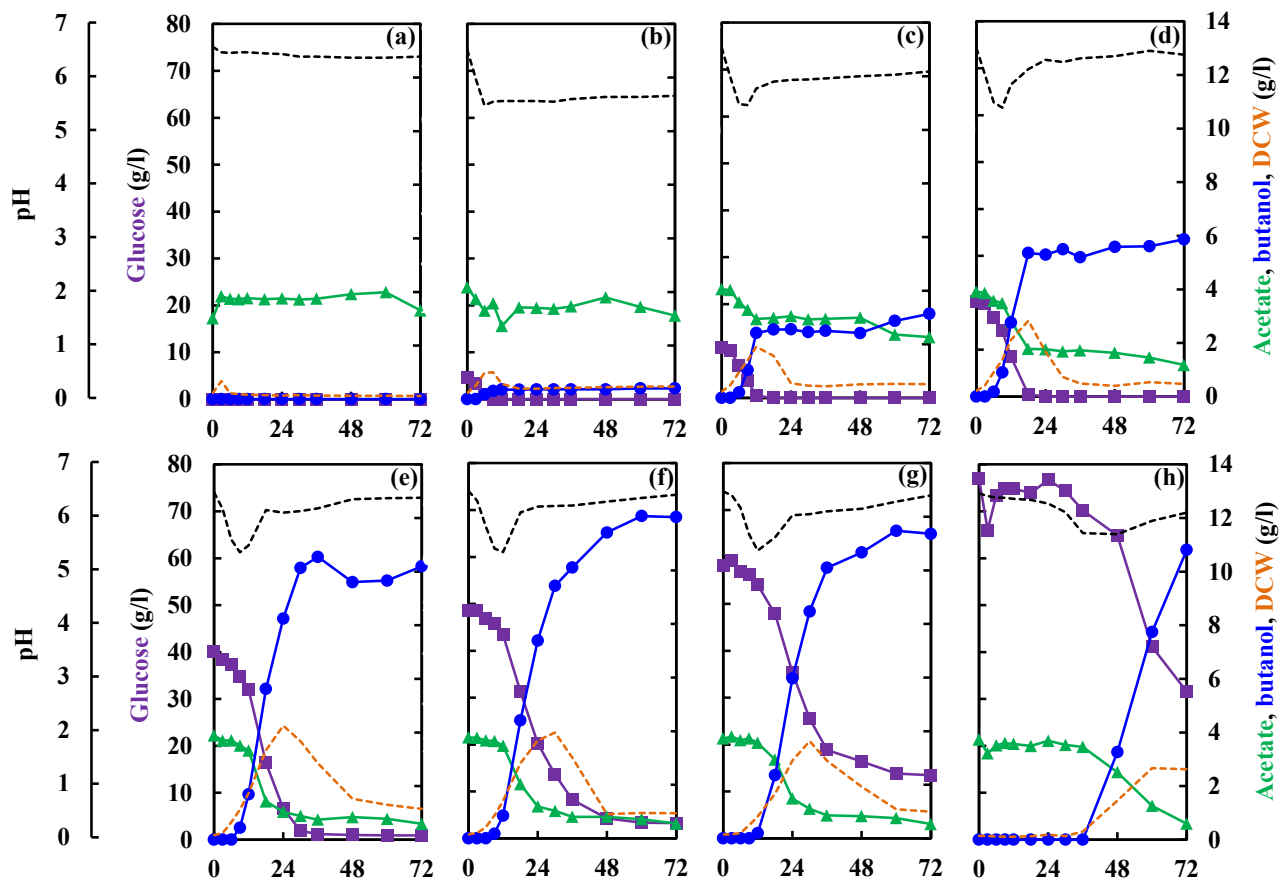

**Fig. S1** Time course of batch culture with different concentrations of glucose ranging from 0–80 g/L (working volume, 70 ml). (a) G0; (b) G4; (c) G10; (d) G20; (e) G40; (f) G50; (g) G60; (h) G80. (G: glucose). Symbols: butanol concentration in the broth, blue *circles*; acetate, green *triangles*; glucose, purple *squares*; pH, black *dashed line*; DCW, brown *dashed line*.

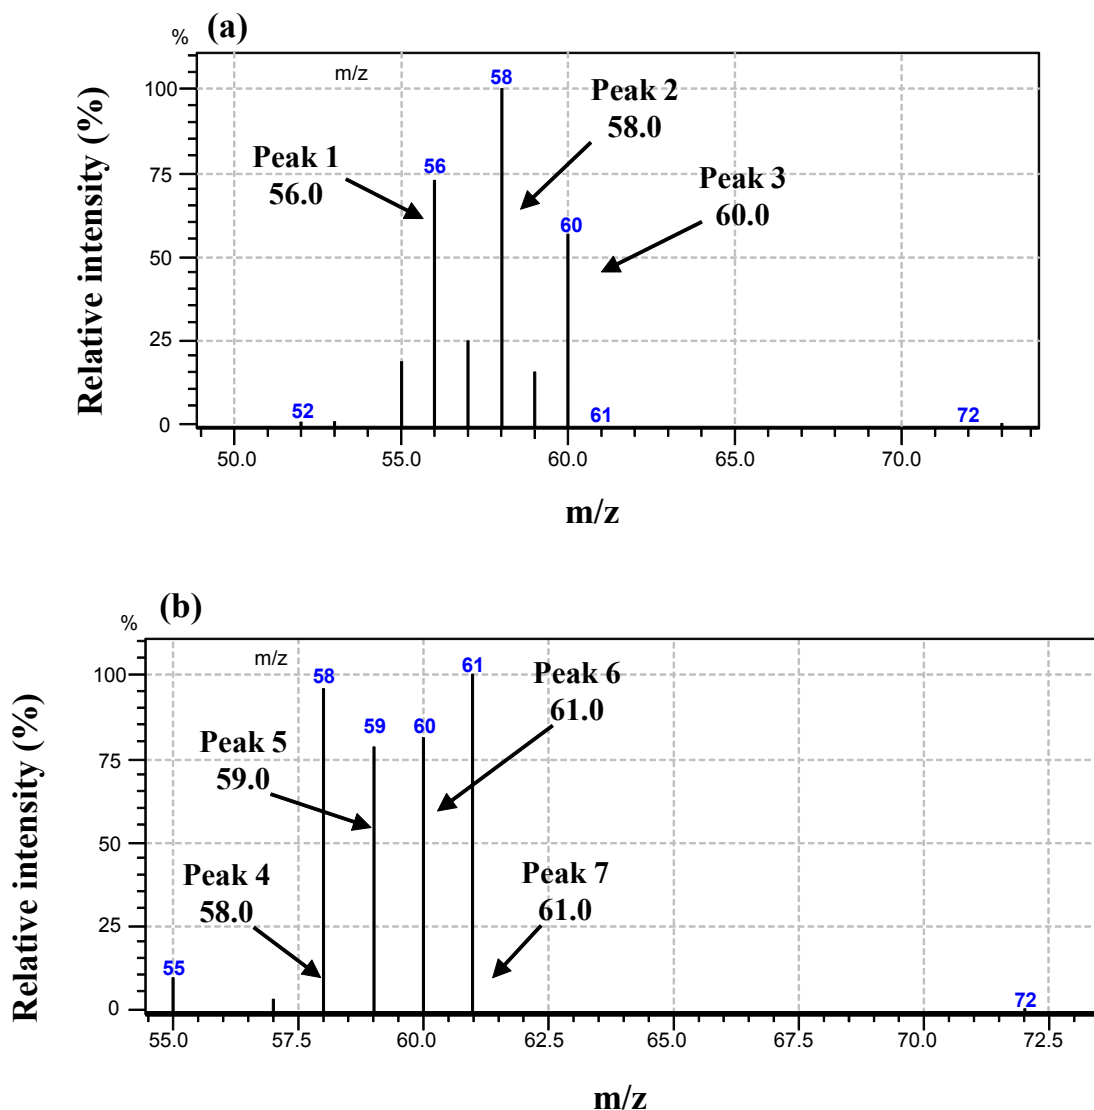

**Fig. S2** Mass spectra of butanol and acetone by GC-MS analysis. (a) Mass spectra of butanol in culture broth of the N1-4 strain, cultured with  $^{12}\text{C}_6$ -glucose and [1, 2- $^{13}\text{C}_2$ ] acetate at 9 h. Peak 1, 2 and 3 (indicated by arrows), were derived from three isotopes of butanol:  $^{12}\text{C}_4$ -butanol;  $^{13}\text{C}_2$ -butanol, in which two out of four carbons were replaced by a  $^{13}\text{C}$ -atom; and  $^{13}\text{C}_4$ -butanol, respectively. (b) Mass spectra of acetone in culture broth of the N1-4 strain, cultured with  $^{12}\text{C}_6$ -glucose and [1, 2- $^{13}\text{C}_2$ ] acetate at 9 h. Peak 4, 5, 6 and 7, indicated by arrows, were derived from four isotopes of acetone:  $^{12}\text{C}_3$ -acetone;  $^{13}\text{C}_1$ -acetone, in which one out of three carbons was replaced by  $^{13}\text{C}$ -atom;  $^{13}\text{C}_2$ -acetone, in which two out of three carbons were replaced by  $^{13}\text{C}$ -atom; and  $^{13}\text{C}_3$ -acetone, respectively. X-axis: m/z (mass-to-charge ratio).
